# Supplementary material for: Evaluation of Secondhand Smoke Exposure in New York City Public Housing After Implementation of the 2018 Federal Smoke-Free Housing Policy
Source: PubMed Central journal article supplement (PMC7645700; doi:10.1001/jamanetworkopen.2020.24385), 2020-11-05

## Supplementary Online Content

Thorpe LE, Anastasiou E, Wyka K, et al. Evaluation of secondhand smoke exposure in New York City public housing after implementation of the 2018 federal smoke-free housing policy. *JAMA Netw Open*. 2020;3(11):e2024385.  
doi:10.1001/jamanetworkopen.2020.24385

**eFigure.** Flow Diagram for Longitudinal Air Monitoring by Study Arm

This supplementary material has been provided by the authors to give readers additional information about their work.

**eFigure.** Flow Diagram for Longitudinal Air Monitoring by Study Arm

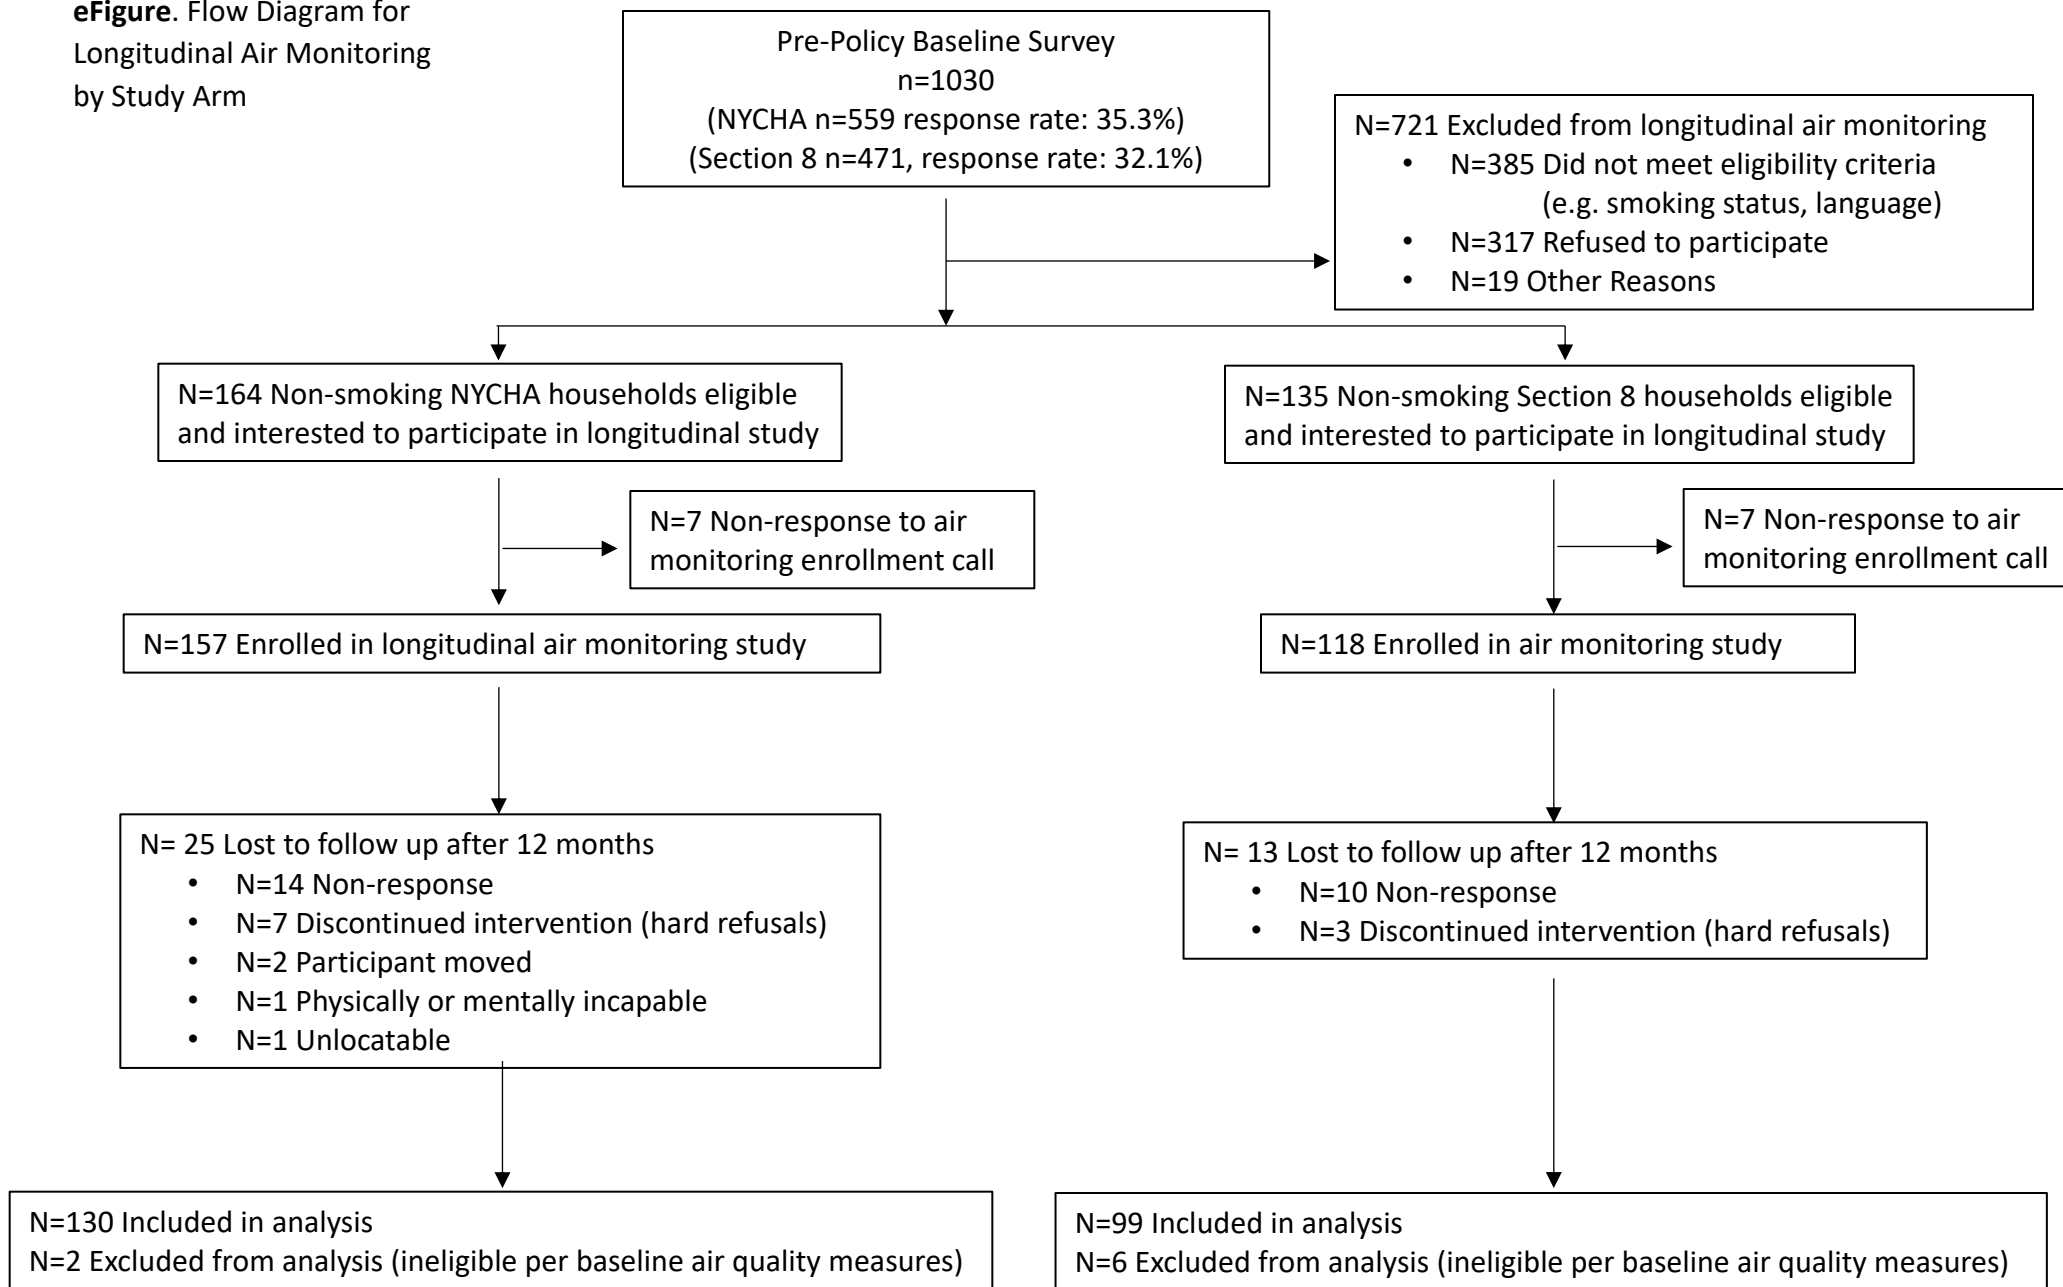

Supplement: jamanetwopen-e2024385-s001.pdf [file jamanetwopen-e2024385-s001.pdf]
